# Supplementary material for: Long-term ambient hydrocarbons exposure and incidence of ischemic stroke
Source: PLoS One. 2019 Dec 4;14(12):e0225363. doi: 10.1371/journal.pone.0225363 (PMC6892494; doi:10.1371/journal.pone.0225363)
Supplement: S1 Table — CO2, carbon dioxide; CO, carbon monoxide; CH4, methane; NMHC, nonmethane hydrocarbons; NO, nitrogen monoxide; NO2, nitrogen dioxide; NOX, nitrogen oxides; O3, ozone; PM10, particulate matter < 10 μm in size; PM2.5, particulate matter < 2.5 μm in size; SO2, sulfur dioxide; THC, total hydrocarbons. †Correlation significant at the 0.01 level (two-tailed). *Correlation significant at the 0.05 level (two-tailed). Correlation coefficient values of < 0.3 denote a low strength of correlation, which qualified as the controlling pollutant in multiple-pollutant models of targeted pollutants. (DOCX) [file pone.0225363.s001.docx]

# **Supporting Information**

# **Long-term ambient hydrocarbons exposure and incidence of ischemic stroke**

**S1 Table. Pearson’s correlation analysis for air pollutants over 10-year exposure period**

|  | SO2 | CO2 | CO | O3 | PM10 | PM2.5 | NOX | NO | NO2 | THC | NMHC | CH4 |
| --- | --- | --- | --- | --- | --- | --- | --- | --- | --- | --- | --- | --- |
| SO2 | 1 | **0.110†** | **0.229†** | **0.016†** | 0.613† | 0.618† | 0.313† | **0.120†** | 0.486† | **0.129†** | **0.186†** | **0.007†** |
| CO2 |  | 1 | -0.359† | **0.102†** | 0.440† | **0.284†** | **-0.243†** | -0.326† | **-0.134†** | -0.534† | -0.457† | -0.421† |
| CO |  |  | 1 | -0.612† | **-0.236†** | **-0.138†** | 0.948† | 0.927† | 0.870† | 0.736† | 0.901† | **0.239†** |
| O3 |  |  |  | 1 | 0.304† | **0.264†** | -0.531† | -0.478† | -0.532† | -0.441† | -0.464† | **-0.230†** |
| PM10 |  |  |  |  | 1 | 0.927† | **-0.197†** | -0.378† | **0.019†** | **-0.156†** | -0.309† | **0.071†** |
| PM2.5 |  |  |  |  |  | 1 | **-0.124†** | -0.314† | **0.095†** | **-0.162†** | **-0.254†** | **0.004*** |
| NOX |  |  |  |  |  |  | 1 | 0.952† | 0.945† | 0.692† | 0.882† | **0.186†** |
| NO |  |  |  |  |  |  |  | 1 | 0.799† | 0.756† | 0.922† | **0.248†** |
| NO2 |  |  |  |  |  |  |  |  | 1 | 0.550† | 0.743† | **0.099†** |
| THC |  |  |  |  |  |  |  |  |  | 1 | 0.809† | 0.772† |
| NMHC |  |  |  |  |  |  |  |  |  |  | 1 | **0.253†** |
| CH4 |  |  |  |  |  |  |  |  |  |  |  | 1 |

CO2, carbon dioxide; CO, carbon monoxide; CH4, methane; NMHC, nonmethane hydrocarbons; NO, nitrogen monoxide; NO2, nitrogen dioxide; NOX, nitrogen oxides; O3, ozone; PM10, particulate matter < 10 μm in size; PM2.5, particulate matter < 2.5 μm in size; SO2, sulfur dioxide; THC, total hydrocarbons.

†Correlation significant at the 0.01 level (two-tailed).

*Correlation significant at the 0.05 level (two-tailed).

**Correlation coefficient values of <0.3 denote a low strength of correlation, which qualified as the controlling pollutant in multiple-pollutant models of targeted pollutants.**
